# Supplementary material for: Coordinating Effect of VEGFC and Oleic Acid Drives Tumor Lymphangiogenesis
Source: Preprints.org preprint supplement (doi:10.20944/preprints202104.0225.v1), 2021-04-08
Supplement: Supplementary file 2 [file supplementary]

(listing pending)
